# Supplementary material
Source: Research Square preprint supplement (doi:10.21203/rs.3.rs-8783242/v1)
Supplement: Supplementary file 1 [file c73672a45fce4b33f22fc0a6.docx]

### Teaching Satisfaction Questionnaire for Cerebral Angiography Teaching

**Survey Description**：This questionnaire is designed to evaluate the teaching effect of the neurointerventional vascular model combined with mind map in cerebral angiography teaching, including 4 core evaluation dimensions and 16 specific items. Please score objectively based on your actual learning experience with a 5-point Likert scale (1=Strongly disagree; 2=Disagree; 3=Neutral; 4=Agree; 5=Strongly agree). The average score of all items is calculated, and an **average score ≥4** is defined as satisfaction with the teaching model. The questionnaire is anonymous, and all results are only used for teaching research. Thank you for your cooperation!

| **No.** | **Evaluation Dimension** | **Specific Evaluation Items** | **Score**  **(1-5)** |
| --- | --- | --- | --- |
| 1 | Knowledge Comprehension | This teaching model helps me master the theoretical knowledge of cerebral angiography systematically |  |
| 2 | This teaching model enables me to clearly understand the correlation between cerebral vascular anatomy and angiographic operations |  |
| 3 | This teaching model helps me quickly grasp the indications and contraindications of cerebral angiography |  |
| 4 | This teaching model is conducive to mastering the knowledge of identification, prevention and management of cerebral angiography complications |  |
| 5 | Skill Improvement | This teaching model significantly improves my proficiency in cerebral angiography operations |  |
| 6 | This teaching model helps me accurately master the key steps and core skills of cerebral angiography operations |  |
| 7 | This teaching model improves my mastery of the basic operation of DSA angiography equipment |  |
| 8 | This teaching model allows me to complete basic operations such as angiographic guidewire and catheter placement more standardly |  |
| 9 | Learning Interest Stimulation | This teaching model significantly enhances my learning interest in neurointervention and cerebral angiography |  |
| 10 | Vascular model practice/mind map construction makes me more willing to take the initiative in cerebral angiography teaching activities |  |
| 11 | The teaching form is diverse and avoids the tediousness of theoretical learning |  |
| 12 | The interactive design of this teaching model effectively enhances my initiative in autonomous learning |  |
| 13 | Clinical Thinking Cultivation | This teaching model helps me establish a clinical thinking framework related to cerebral angiography |  |
| 14 | This teaching model improves my ability to analyze clinical cases related to cerebral angiography |  |
| 15 | This teaching model enables me to better combine theoretical knowledge with practical operation for thinking |  |
| 16 | This teaching model improves my ability to predict potential risks during cerebral angiography operations |  |
